# Supplementary material for: Effect of CeO2 morphology on the catalytic properties of Au/CeO2 for base-free glucose oxidation
Source: Royal Society of Chemistry journal article supplement (doi:10.1039/d1cy02078a), 2022-01-01
Supplement: d1cy02078a1.pdf [file d1cy02078a1.pdf]

Supporting Information

**Effect of CeO<sub>2</sub> Morphology on the Catalytic Properties of Au/CeO<sub>2</sub> for  
Base-Free Glucose Oxidation**

Xingyue Qi, Yalin He, Yan Yao, Yiran Li, Lu Zhang, Miao Geng, Hang Wei\*, Haibin Chu\*

College of Chemistry and Chemical Engineering, Inner Mongolia Engineering and Technology  
Research Center for Catalytic Conversion and Utilization of Carbon Resource Molecules, Inner  
Mongolia University, Hohhot 010021, China

\*Corresponding author: E-mail address: weihang@imu.edu.cn, chuhb@imu.edu.cn

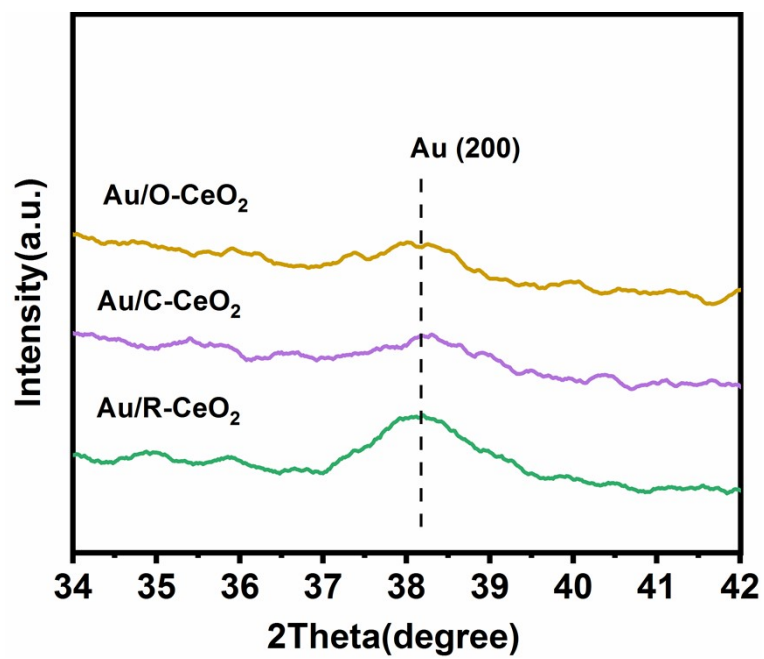

Fig. S1. The enlarged XRD patterns of Au/CeO<sub>2</sub> catalysts.

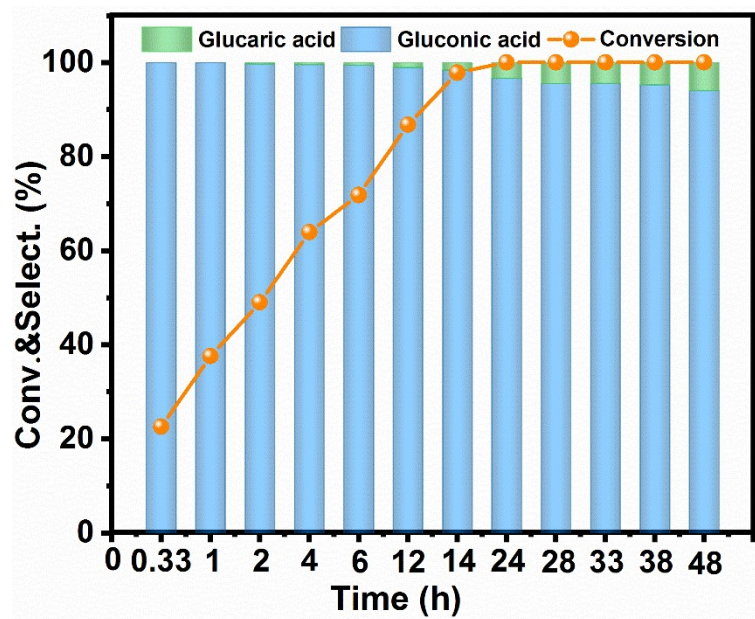

**Fig. S2.** The time evolution of conversion and selectivity of glucose oxidation over Au/R-CeO<sub>2</sub> catalyst. Reaction conditions: 150 mM glucose, 20 mg catalysts, 10 mL water, 80°C.

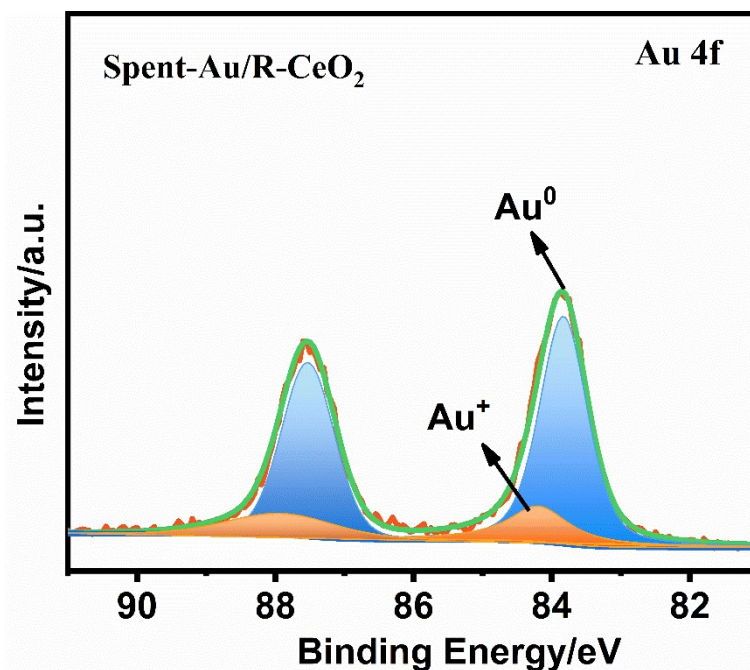

Fig. S3. Au4f XPS spectrum of the spent Au/R-CeO<sub>2</sub> catalyst.

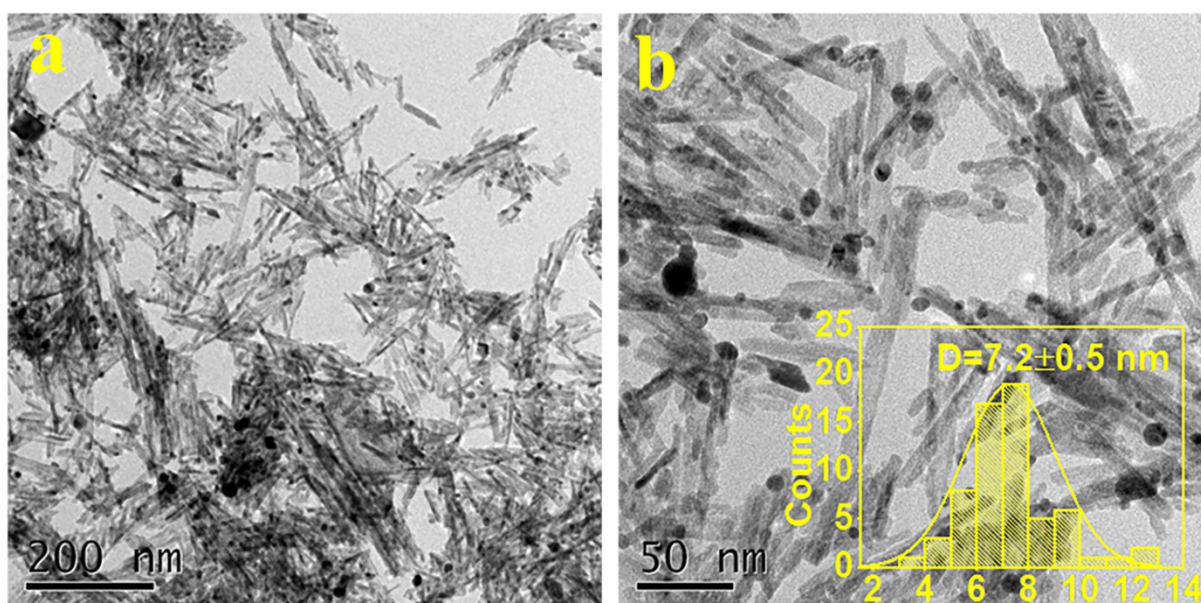

Fig. S4. TEM images of the spent Au/R-CeO<sub>2</sub>. The inset in b shows the size distribution of Au particles.

**Table S1.** Glucose oxidation performances over noble metal catalysts using molecular oxygen as the oxidant under base-free and atmospheric pressure conditions.

| Catalyst                                                | T/°C | Glu/metal <sup>a</sup> | Time /h | Conv. /% | Selec. /% | Refer.    |
|---------------------------------------------------------|------|------------------------|---------|----------|-----------|-----------|
| Au/R-CeO <sub>2</sub>                                   | 80   | 300                    | 12      | 79.6     | 100       | This work |
| Au/CeO <sub>2</sub>                                     | 120  | 100                    | 18      | 73       | 90        | [1]       |
| Au/Al <sub>2</sub> O <sub>3</sub>                       | 120  | 100                    | 18      | 76       | 95        | [1]       |
| Au/CeO <sub>2</sub> /Al <sub>2</sub> O <sub>3</sub>     | 120  | 100                    | 18      | 78       | 96        | [1]       |
| Au/CeO <sub>2</sub> /ZrO <sub>2</sub>                   | 120  | 100                    | 18      | 77       | 87        | [1]       |
| Au-Mt/Ce                                                | 120  | 100                    | 18      | 75       | 80        | [2]       |
| Au/CeO <sub>2</sub> -ZnO/Al <sub>2</sub> O <sub>3</sub> | 60   | 100                    | 18      | 74       | 100       | [3]       |
| Au/MgO                                                  | 60   | 1225                   | 24      | 57       | 100       | [4]       |
| AuPd/MgO                                                | 60   | 1225                   | 24      | 62       | 100       | [4]       |
| Pd/MgO                                                  | 60   | 1225                   | 24      | 52.7     | 100       | [4]       |
| Au/CMK-3                                                | 60   | 1000                   | 2       | 22.5     | 100       | [5]       |
| Au/C                                                    | 40   | 100                    | 18      | 80       | 100       | [6]       |
| Pt/HT                                                   | 50   | 68                     | 12      | 99       | 83        | [7]       |

<sup>a</sup> The molar ratio of glucose to metal species.

## Reference

- [1] C. Megías-Sayago, S. Ivanova, C. López-Cartes, M. A. Centeno, and J. A. Odriozola, *Catal. Today*, **2017**, 279, 148-154.
- [2] M. Chenouf, C. Megías-Sayago, F. Ammari, S. Ivanova, M. Centeno, and J. Odriozola, *Catalysts*, **2019**, 9, 125-136.
- [3] C. Megias-Sayago, T. R. Reina, S. Ivanova, and J. A. Odriozola, *Front. Chem.*, **2019**, 7, 504-514.
- [4] P. J. Miedziak, H. Alshammari, S. A. Kondrat, T. J. Clarke, T. E. Davies, M. Morad, D. J. Morgan, D. J. Willock, D. W. Knight, S. H. Taylor, and G. J. Hutchings, *Green Chem.*, **2014**, 16, 3132-3141.
- [5] P. Qi, S. Chen, J. Chen, J. Zheng, X. Zheng, and Y. Yuan, *ACS Catal.*, **2015**, 5, 2659-2670.
- [6] C. Megías-Sayago, L. F. Bobadilla, S. Ivanova, A. Penkova, M. A. Centeno, and J. A. Odriozola, *Catal. Today*, **2018**, 301, 72-77.
- [7] A. Tathod, T. Kane, E. S. Sanil, and P. L. Dhepe, *J. Mol. Catal. A: Chem.*, **2014**, 388-389, 90-99.
